# Supplementary material for: Decoding bee cleptoparasitism through comparative transcriptomics of Coelioxoides waltheriae and its host Tetrapedia diversipes
Source: PubMed Central journal article supplement (PMC11137135; doi:10.1038/s41598-024-56261-5), 2024-05-29
Supplement: 41598_2024_56261_MOESM2_ESM.pdf [file 41598_2024_56261_MOESM2_ESM.pdf]

# Decoding bee cleptoparasitism through comparative transcriptomics of *Coelioxoides waltheriae* and its host *Tetrapedia diversipes*

Paulo Cseri Ricardo<sup>1\*</sup>, Maria Cristina Arias<sup>1</sup> and Natalia de Souza Araujo<sup>2</sup>

<sup>1</sup> Departamento de Genética e Biologia Evolutiva – Instituto de Biociências, Universidade de São Paulo, São Paulo, Brazil.

<sup>2</sup> Unit of Evolutionary Biology & Ecology – Université libre de Bruxelles, Brussels, Belgium.

\*Corresponding author: P. C. Ricardo - [cseri.bio@gmail.com](mailto:cseri.bio@gmail.com)

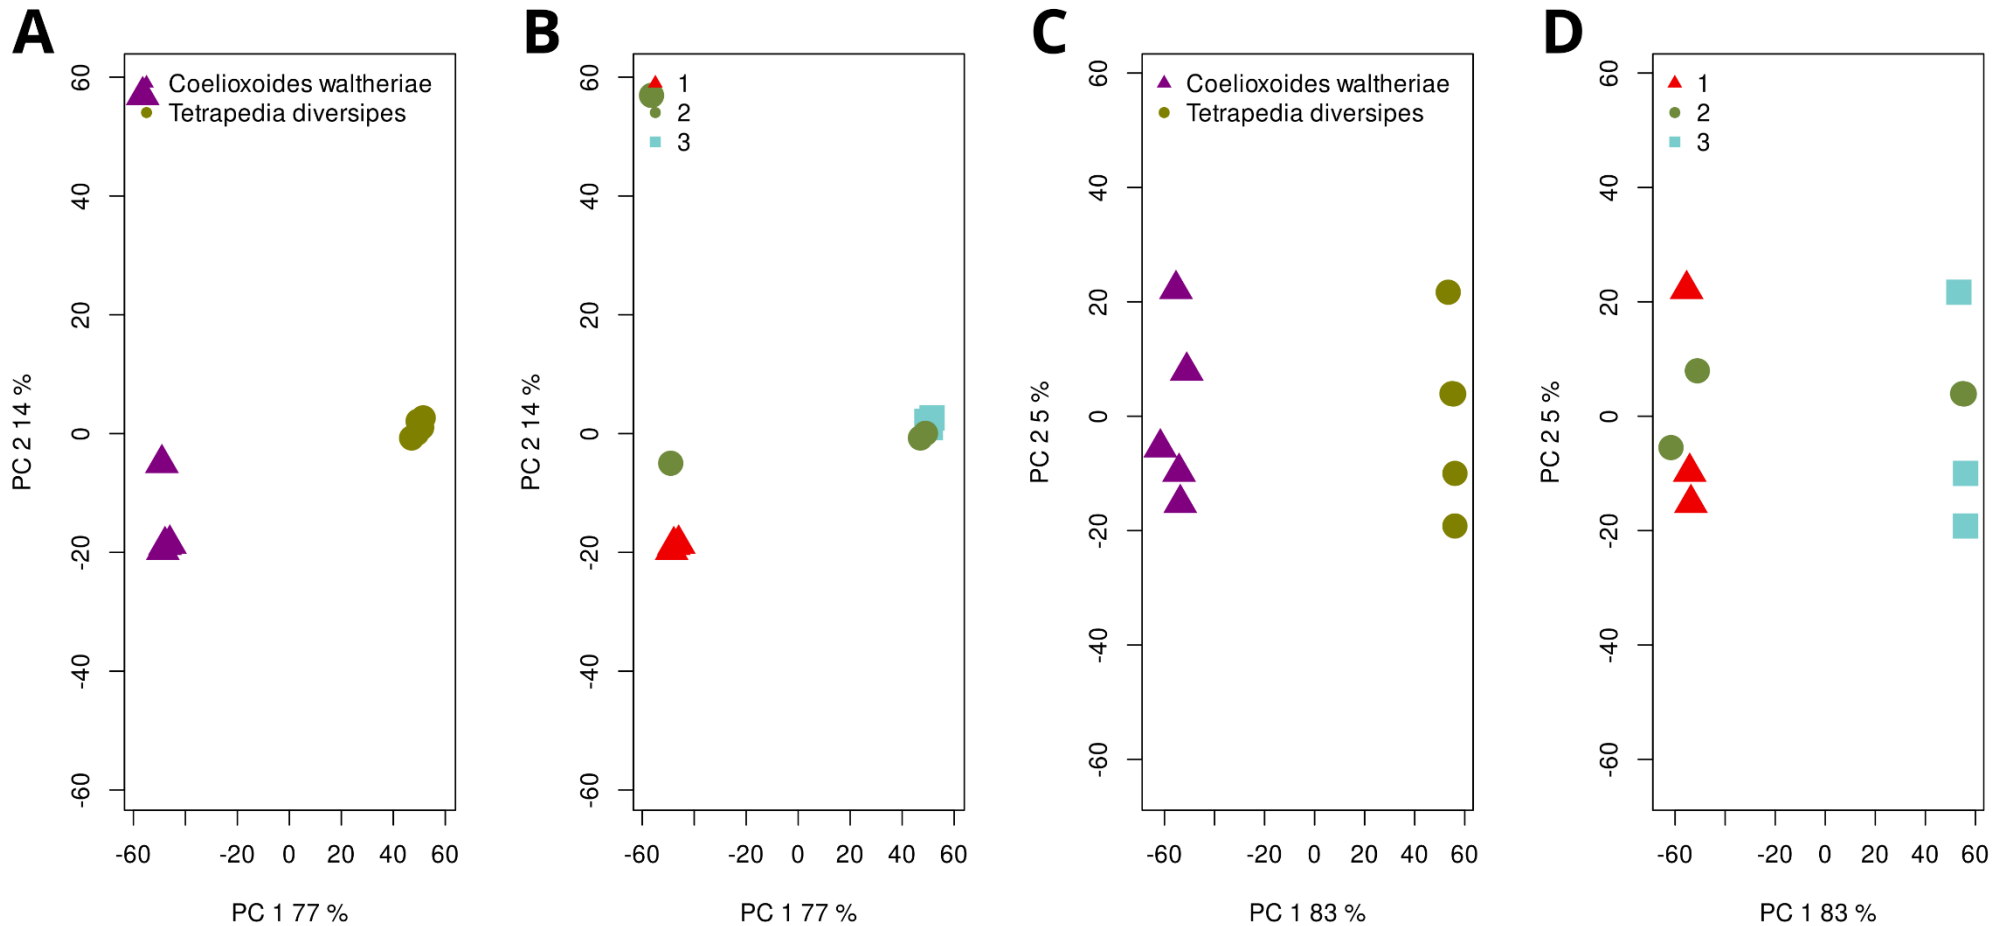

**Figure 1.** Principal component analysis (PCA) plots showing samples of *Coelioxoides waltheriae* (purple triangles) and *Tetrapedia diversipes* (olive circles) based on gene expression profile, before (A) and after (C) batch correction on raw data. The samples from each batch (batch 1: red triangles; 2: green circles; 3: blue squares) are represented in the same way, before (B) and after (D) correction. The X- and Y-axes represent the first and second principal components (PC1 and PC2) and the associated percentage of variation.
