# Supplementary material for: Decoding bee cleptoparasitism through comparative transcriptomics of Coelioxoides waltheriae and its host Tetrapedia diversipes
Source: PubMed Central journal article supplement (PMC11137135; doi:10.1038/s41598-024-56261-5), 2024-05-29
Supplement: 41598_2024_56261_MOESM5_ESM.pdf [file 41598_2024_56261_MOESM5_ESM.pdf]

# Decoding bee cleptoparasitism through comparative transcriptomics of *Coelioxoides waltheriae* and its host *Tetrapedia diversipes*

Paulo Cseri Ricardo<sup>1\*</sup>, Maria Cristina Arias<sup>1</sup> and Natalia de Souza Araujo<sup>2</sup>

<sup>1</sup> Departamento de Genética e Biologia Evolutiva – Instituto de Biociências, Universidade de São Paulo, São Paulo, Brazil.

<sup>2</sup> Unit of Evolutionary Biology & Ecology – Université libre de Bruxelles, Brussels, Belgium.

\*Corresponding author: P. C. Ricardo - [cseri.bio@gmail.com](mailto:cseri.bio@gmail.com)

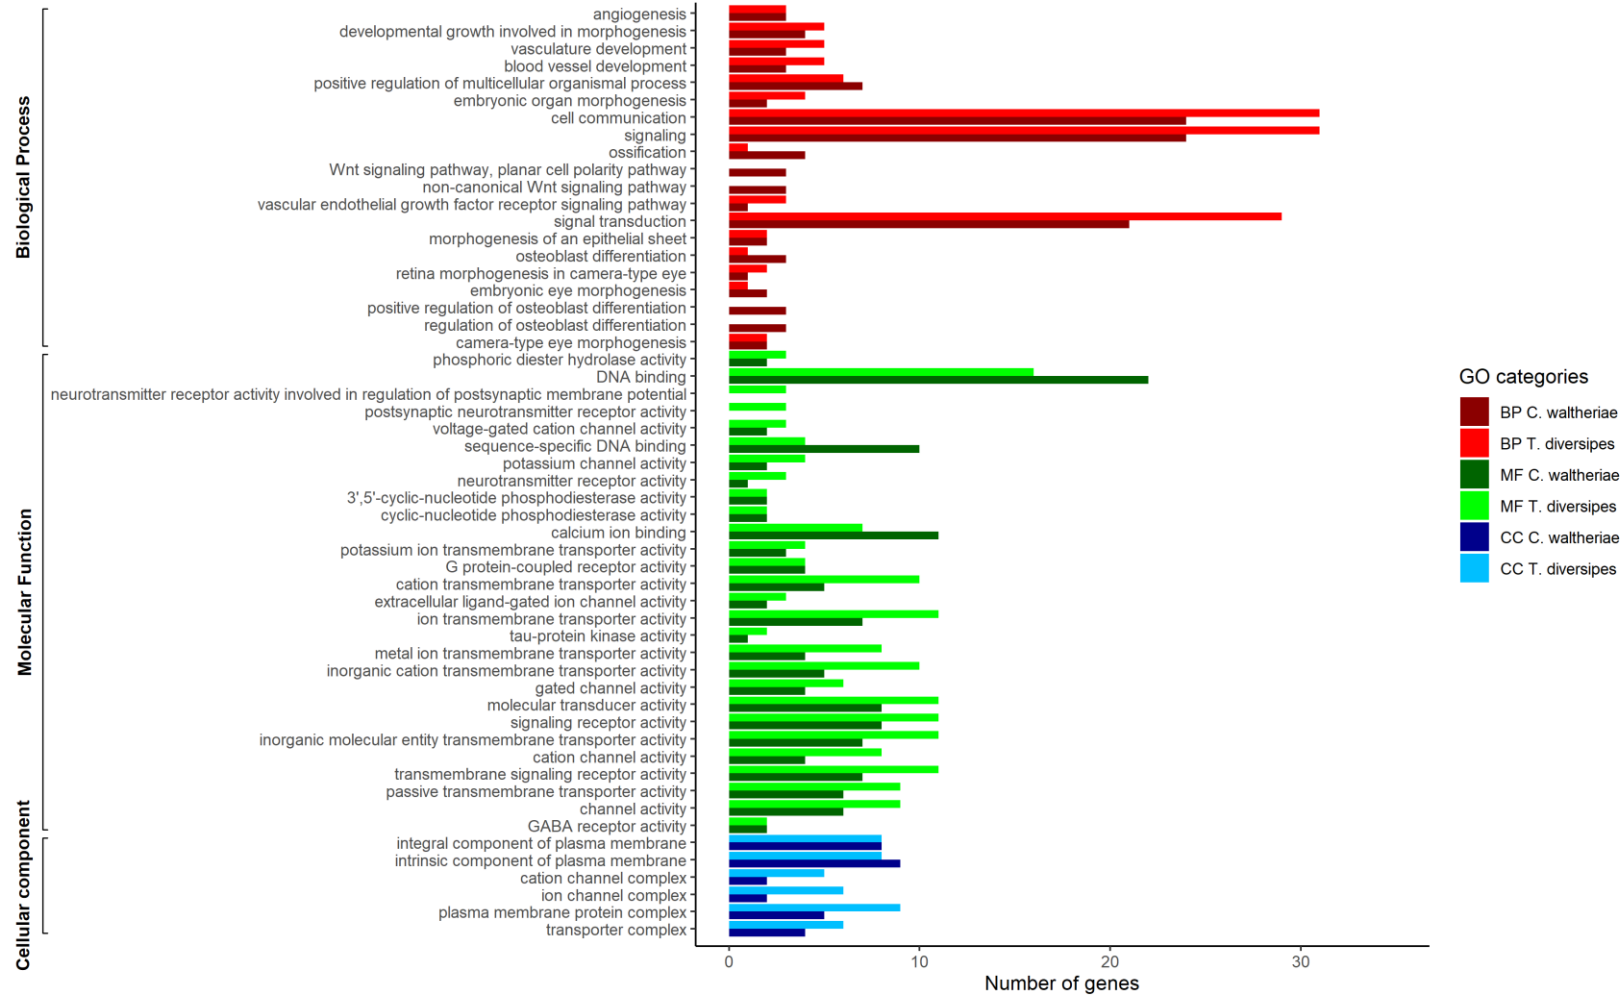

**Figure 2.** Gene ontology (GO) functional classification of *Coelioxoides waltheriae* (darker) and *Tetrapedia diversipes* (lighter) differently expressed orthologs. The GO functional annotations were classified into three main categories: Cellular Component (blue), Molecular Function (green) and Biological Process (red).
